# Supplementary material for: Reduced expression of CD109 in tumor-associated endothelial cells promotes tumor progression by paracrine interleukin-8 in hepatocellular carcinoma
Source: PubMed Central journal article supplement (PMC5045399; doi:10.18632/oncotarget.8787), 2016-04-18
Supplement: oncotarget-07-29333-s001.pdf [file oncotarget-07-29333-s001.pdf]

## Reduced expression of CD109 in tumor-associated endothelial cells promotes tumor progression by paracrine interleukin-8 in hepatocellular carcinoma

### Supplementary Materials

A

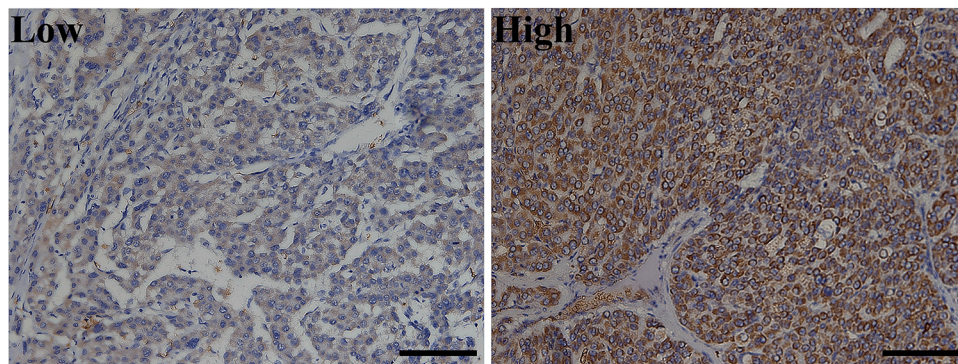

B

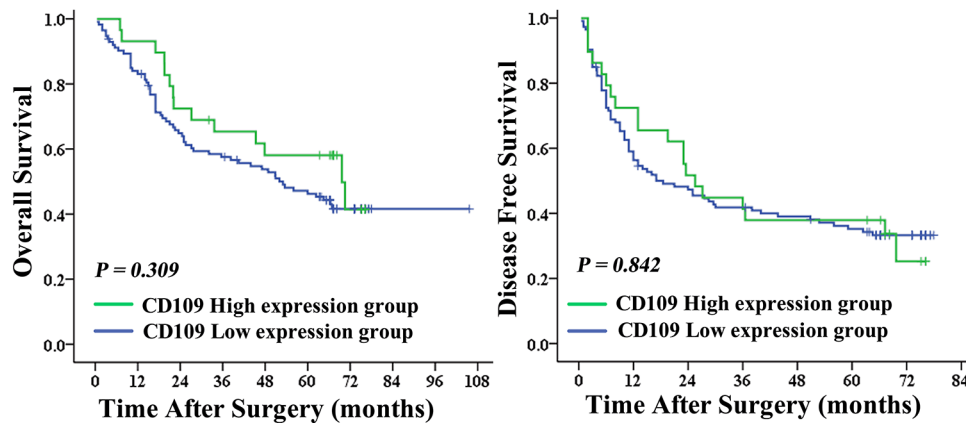

**Supplementary Figure S1: The expression of CD109 on HCC tumor cells and its association with patient prognosis.** (A) Representative images of IHC staining showed the expression of CD109 on HCC tumor cells. (B) Kaplan-Meier curves showed that CD109 expression on HCC tumor cells was not associated with overall survival and disease-free survival using log-rank test. Scale bars, 100  $\mu\text{m}$ .

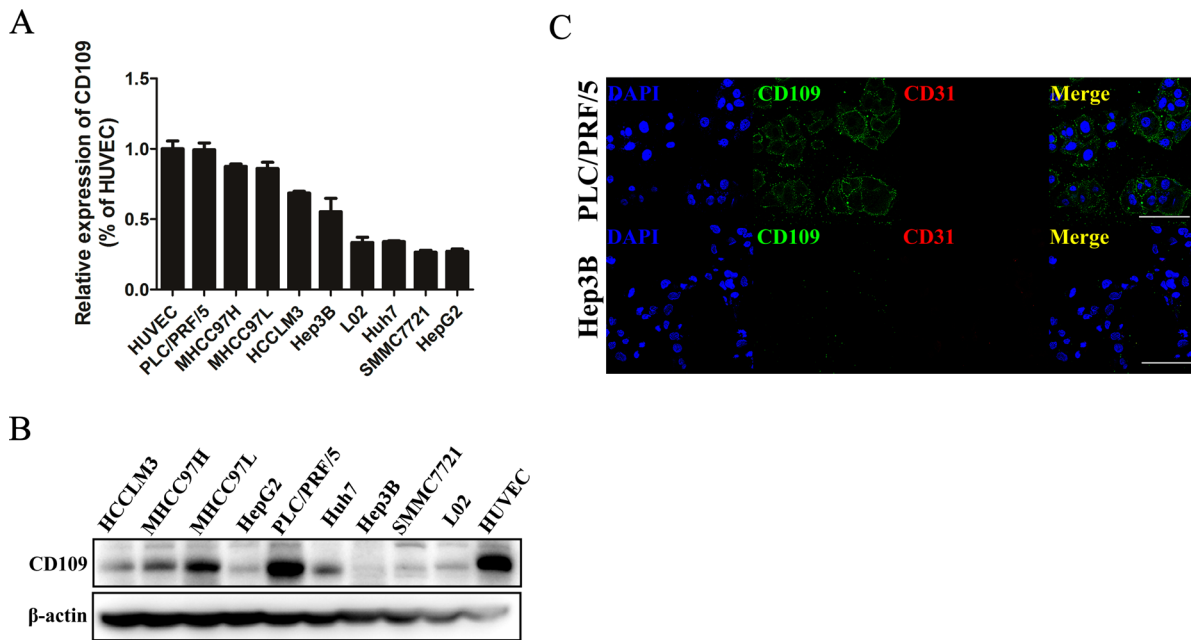

**Supplementary Figure S2: The expression of CD109 on several cell lines.** (A) qRT-PCR and (B) WB showed the different CD109 mRNA and protein expression in eight human HCC cell lines and the human normal liver cell line (L02) and HUVEC. (C) Representative images of double IF staining CD109 (green) and CD31 (red) in PLC/PRF/5 and Hep3B cells. Scale bars, 100  $\mu$ m. GAPDH was used as internal control for qRT-PCR.  $\beta$ -actin served as a loading control for WB. Data shown as mean  $\pm$  SD were from triplicates of three independent experiments.

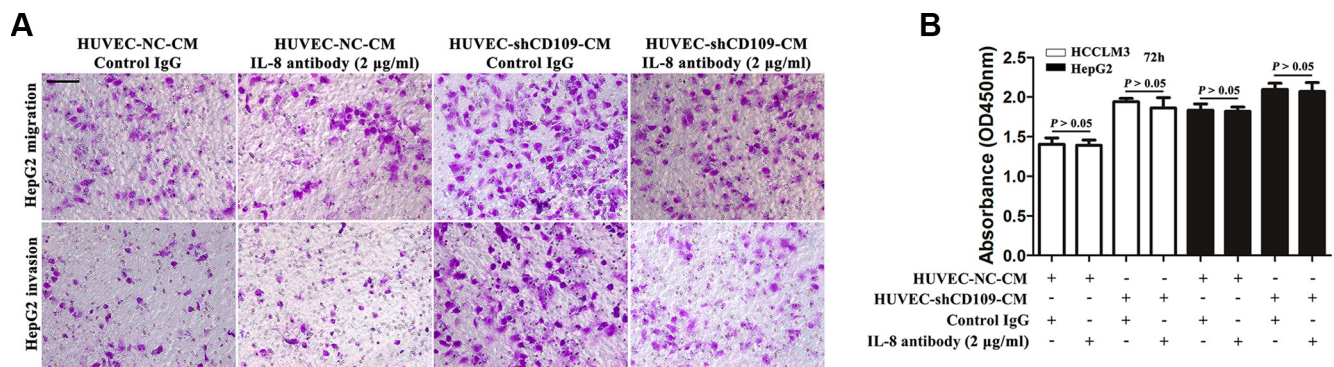

**Supplementary Figure S3: IL-8 mediated the paracrine pro-tumor effects of CD109 knockdown in HUVEC.** (A) Representative images of Boyden chamber cell migration and invasion assays showed that HepG2 cell migration and invasion promoted by CD109 knockdown were significantly suppressed when IL-8 was neutralized. (B) Cell proliferation assays showed that neutralization of IL-8 did not inhibit HUVEC-shCD109 mediated promotion of tumor cell proliferation. Scale bars, 100  $\mu$ m. Data shown as mean  $\pm$  SD were from triplicates of three independent experiments.  $P > 0.05$  by  $t$  test. CM, conditioned media; NC, negative control.

**Supplementary Table S1: Correlation between CD109 expression on tumor vessels and clinicopathological characteristics**

| CD109 expression on tumor vessels ( <i>n</i> = 142) |                       |      |                      |      |                |
|-----------------------------------------------------|-----------------------|------|----------------------|------|----------------|
| Variable                                            | High ( <i>n</i> = 47) |      | Low ( <i>n</i> = 95) |      | <i>P</i> value |
|                                                     | No. of patients       | %    | No. of patients      | %    |                |
| Age, years <sup>a</sup>                             | 54.0 ± 9.9            |      | 49.6 ± 11.1          |      | <b>0.023</b>   |
| Gender                                              |                       |      |                      |      | 0.615          |
| Male                                                | 38                    | 80.9 | 80                   | 84.2 |                |
| Female                                              | 9                     | 19.1 | 15                   | 15.8 |                |
| HBsAg                                               |                       |      |                      |      | 0.787          |
| Positive                                            | 43                    | 91.5 | 84                   | 88.4 |                |
| Negative                                            | 4                     | 8.5  | 11                   | 11.6 |                |
| AFP                                                 |                       |      |                      |      | 0.373          |
| ≤ 20 ng/ml                                          | 26                    | 55.3 | 45                   | 47.4 |                |
| > 20 ng/ml                                          | 21                    | 44.7 | 50                   | 52.6 |                |
| Liver cirrhosis                                     |                       |      |                      |      |                |
| Yes                                                 | 40                    | 85.1 | 73                   | 76.8 | 0.250          |
| No                                                  | 7                     | 14.9 | 22                   | 23.2 |                |
| Tumor size                                          |                       |      |                      |      | <b>0.010</b>   |
| ≤ 5 cm                                              | 34                    | 72.3 | 47                   | 50.5 |                |
| > 5 cm                                              | 13                    | 27.7 | 48                   | 49.5 |                |
| Tumor number                                        |                       |      |                      |      | 0.179          |
| Single                                              | 43                    | 91.5 | 79                   | 83.2 |                |
| Multiple                                            | 4                     | 8.5  | 16                   | 16.8 |                |
| Tumor encapsulation                                 |                       |      |                      |      | 0.065          |
| Complete                                            | 27                    | 57.4 | 39                   | 41.1 |                |
| No                                                  | 20                    | 42.6 | 56                   | 58.9 |                |
| Microvascular invasion                              |                       |      |                      |      | <b>0.036</b>   |
| Yes                                                 | 15                    | 31.9 | 48                   | 50.5 |                |
| No                                                  | 32                    | 68.1 | 47                   | 49.5 |                |
| Tumor differentiation                               |                       |      |                      |      | 0.114          |
| I–II                                                | 35                    | 74.5 | 58                   | 61.1 |                |
| III–IV                                              | 12                    | 25.5 | 37                   | 38.9 |                |
| TNM stage                                           |                       |      |                      |      | <b>0.015</b>   |
| I                                                   | 29                    | 61.7 | 38                   | 40.0 |                |
| II                                                  | 16                    | 34.0 | 39                   | 41.1 |                |
| IIIA                                                | 2                     | 4.3  | 18                   | 18.9 |                |

Abbreviations: HBsAg, hepatitis B s antigen; AFP,  $\alpha$ -fetoprotein; TNM, tumor-nodes-metastasis.

<sup>a</sup>Student's *t*-test.

**Supplementary Table S2: Univariate and multivariate analyses of factors associated with survival and recurrence**

| Features                              | OS                  |       |             |              | DFS                 |              |                    |              |
|---------------------------------------|---------------------|-------|-------------|--------------|---------------------|--------------|--------------------|--------------|
|                                       | Multivariate        |       |             |              | Multivariate        |              |                    |              |
|                                       | Univariate <i>P</i> | HR    | 95% CI      | <i>P</i>     | Univariate <i>P</i> | HR           | 95% CI             | <i>P</i>     |
| Age: < 52 vs ≥ 52 years               | 0.809               |       |             | NA           | 0.779               |              |                    | NA           |
| Gender: female vs male                | 0.367               |       |             | NA           | 0.332               |              |                    | NA           |
| HBsAg: positive vs negative           | 0.320               |       |             | NA           | 0.164               |              |                    | NA           |
| Liver cirrhosis: yes vs no            | 0.230               |       |             | NA           | 0.302               |              |                    | NA           |
| AFP: > 200 ng/dL vs ≤ 200 ng/dL       | 0.447               |       |             | NA           | 0.428               |              |                    | NS           |
| Tumor size: > 5 cm vs ≤ 5 cm          | <b>0.000</b>        | 2.605 | 1.383–4.909 | <b>0.003</b> | <b>0.002</b>        |              |                    | NS           |
| Tumor number: single vs multiple      | 0.559               |       |             | NA           | <b>0.024</b>        |              |                    | NS           |
| Tumor encapsulation: complete vs none | 0.317               |       |             | NA           | 0.491               |              |                    | NA           |
| Microvascular invasion: no vs yes     | <b>0.006</b>        |       |             | NS           | <b>0.041</b>        |              |                    | NS           |
| Tumor differentiation: III–IV vs I–II | <b>0.001</b>        |       |             | NA           | <b>0.000</b>        | <b>2.451</b> | <b>1.410–4.260</b> | <b>0.001</b> |
| TNM stage: IIIA vs II vs I            | <b>0.000</b>        |       |             | NS           | <b>0.001</b>        | <b>2.540</b> | <b>1.107–5.830</b> | <b>0.028</b> |
| Tumor vessels CD109 high vs low       | <b>0.002</b>        | 0.487 | 0.234–1.014 | 0.054        | <b>0.000</b>        | <b>0.322</b> | <b>0.166–0.623</b> | <b>0.001</b> |

Abbreviations: OS, overall survival; DFS, disease-free survival; HR, hazard ratio; CI, confidence interval; NA, not adopted; NS, not significant; HBsAg, hepatitis B s antigen; AFP,  $\alpha$ -fetoprotein; NS, not significant; TNM, tumor-nodes-metastasis.

**Supplementary Table S3: Primary antibodies for WB, IHC and IF**

| Primary antibody | Concentration for WB | Concentration for IHC | Concentration for IF | Specificity       | Molecular weight | Company                   |
|------------------|----------------------|-----------------------|----------------------|-------------------|------------------|---------------------------|
| CD109            |                      | 1:100                 |                      | Mouse monoclonal  | 159              | R&D                       |
| CD109            | 1:2000               |                       | 1:100                | Sheep polyclonal  | 159              | R&D                       |
| CD31             |                      |                       | 1:50                 | Mouse monoclonal  | 130              | Santa Cruz                |
| TGF- $\beta$ RI  | 1:1000               |                       |                      | Rabbit polyclonal | 56               | Abcam                     |
| TGF- $\beta$ RII | 1:500                |                       |                      | Rabbit polyclonal | 65               | Abcam                     |
| p-Smad2          | 1:5000               |                       |                      | Rabbit monoclonal | 52               | Abcam                     |
| Smad2            | 1:5000               |                       |                      | Rabbit monoclonal | 52               | Abcam                     |
| Akt              | 1:1000               |                       |                      | Rabbit monoclonal | 60               | Cell Signaling Technology |
| p-Akt            | 1:1000               |                       |                      | Rabbit monoclonal | 60               | Cell Signaling Technology |
| p-ERK            | 1:1000               |                       |                      | Rabbit monoclonal | 44/42            | Cell Signaling Technology |
| ERK              | 1:1000               |                       |                      | Rabbit monoclonal | 44/42            | Cell Signaling Technology |
| P65              | 1:5000               |                       |                      | Rabbit monoclonal | 65               | Abcam                     |
| p-P65            | 1:5000               |                       |                      | Rabbit monoclonal | 65               | Abcam                     |
| $\beta$ -actin   | 1:5000               |                       |                      | Mouse monoclonal  | 43               | Sigma                     |
| GAPDH            | 1:5000               |                       |                      | Mouse monoclonal  | 36               | Cell Signaling Technology |

Abbreviations: WB, western blotting; IHC, immunohistochemistry; IF, immunofluorescence.
